# Supplementary material
Source: publisher site journal article supplement (https://www.dovepress.com/article/273264)

**Supplement Table 1 The correlation analysis of LINC00466 expression and pathological parameters in glioma tissues**

| Characteristics | （N=30） | LINC00466 | | χ2 | P Value |
| --- | --- | --- | --- | --- | --- |
| High（15） | Low（15） |  |
| Age(yr) |  |  |  | 0.600 | 0.439 |
| ≧60 | 20 | 11 | 9 |  |  |
| ＜60 | 10 | 4 | 6 |  |  |
| Gender |  |  |  | 1.292 | 0.256 |
| Male | 11 | 7 | 4 |  |  |
| Famale | 19 | 8 | 11 |  |  |
| Tumor size |  |  |  | 0.536 | 0.464 |
| ≧4cm | 14 | 6 | 8 |  |  |
| ＜4cm | 16 | 9 | 7 |  |  |
| Tissue type |  |  |  | 2.222 | 0.136 |
| Mixed | 18 | 7 | 11 |  |  |
| Other | 12 | 8 | 4 |  |  |
| WHO grade |  |  |  | 8.571 | 0.003 |
| Ⅰ-Ⅱ | 16 | 4 | 12 |  |  |
| Ⅲ-Ⅳ | 14 | 11 | 3 |  |  |

**Supplement Table 2 All cell lines used in experiments**

| Cell lines | Cell types | Number | Sources | Country |
| --- | --- | --- | --- | --- |
| HEB | Astroglia | HEB09 | Cell bank of CAS | Shanghai, China |
| T98G | glioma | T98G49 | Cell bank of CAS | Shanghai, China |
| A172 | glioma | A172-67 | Cell bank of CAS | Shanghai, China |
| SNB19 | glioma | SNB19-90 | Cell bank of CAS | Shanghai, China |
| U251 | glioma | U251TZ | Cell bank of CAS | Shanghai, China |

**Supplement Table 3 All primer sequences used in experiments**

| **qPCR** | **sense sequence** | **anti-sense sequence** |
| --- | --- | --- |
| LINC00466 | 5’- AGCCCTTCCGTCTTGTTACG -3’ | 5’- GCTTCCCAACTGCAGGTTTC -3’ |
| miR-137 | 5’- GCGCTTATTGCTTAAGAATAC -3’ | 5’- CAGTGCAGGGTCCGAGGT -3’ |
| PPP1R14B | 5’- CAGCTCACGCGCCTCTAC -3’ | 5’- CTCATCCACGTCAATCTCCA -3’ |
| GAPDH | 5’-GGAGCGAGATCCCTCCAAAAT-3’ | 5’-GGCTGTTGTCATACTTCTCATGG-3’ |
| U6 | 5’-CTCGCTTCGGCAGCACA-3’ | 5’-AACGCTTCACGAATTTGCGT-3’ |

**Supplement Table 4 Information for all antibodies used in the experiment**

| **Antibody** | **WB/**  **RIP** | **Product code** | **Specificity** | **Company** |
| --- | --- | --- | --- | --- |
| N-cadherin | 1:1000 | ab76057 | Rabbit Polyclonal | Abcam, China |
| E-cadherin | 1:1000 | ab15148 | Rabbit Polyclonal | Abcam, China |
| Vimentin | 1:2000 | ab137321 | Rabbit Polyclonal | Abcam, China |
| MMP-2 | 1 µg/ml | ab37150 | Rabbit Polyclonal | Abcam, China |
| MMP-9 | 1:1000 | ab38898 | Rabbit Polyclonal | Abcam, China |
| PPP1R14B | 1 mg/ml | 46151-1 | Rabbit Polyclonal | Signalway Antibody, USA |
| β-catenin | 1:5000 | ab32572 | Rabbit Monoclonal | Abcam, China |
| Cyclind1 | 1:200 | ab16663 | Rabbit Monoclonal | Abcam, China |
| Ago2 | / | ab32381 | Rabbit Polyclonal | Abcam, China |
| IgG | / | ab6721 | Goat anti Rabbit | Abcam, China |
| **Antibody** | **IHC** | **Product code** | **Specificity** | **Company** |
| PPP1R14B | 1:200 | ab188150 | Rabbit Polyclonal | Abcam, China |
| Ki-67 | 1:150 | ab15580 | Rabbit monoclonal | Abcam, China |
| IgG | / | ab6721 | Goat anti Rabbit | Abcam, China |

**Supplement Figure1 information of human ethics statement (Approval No. 2020549)**


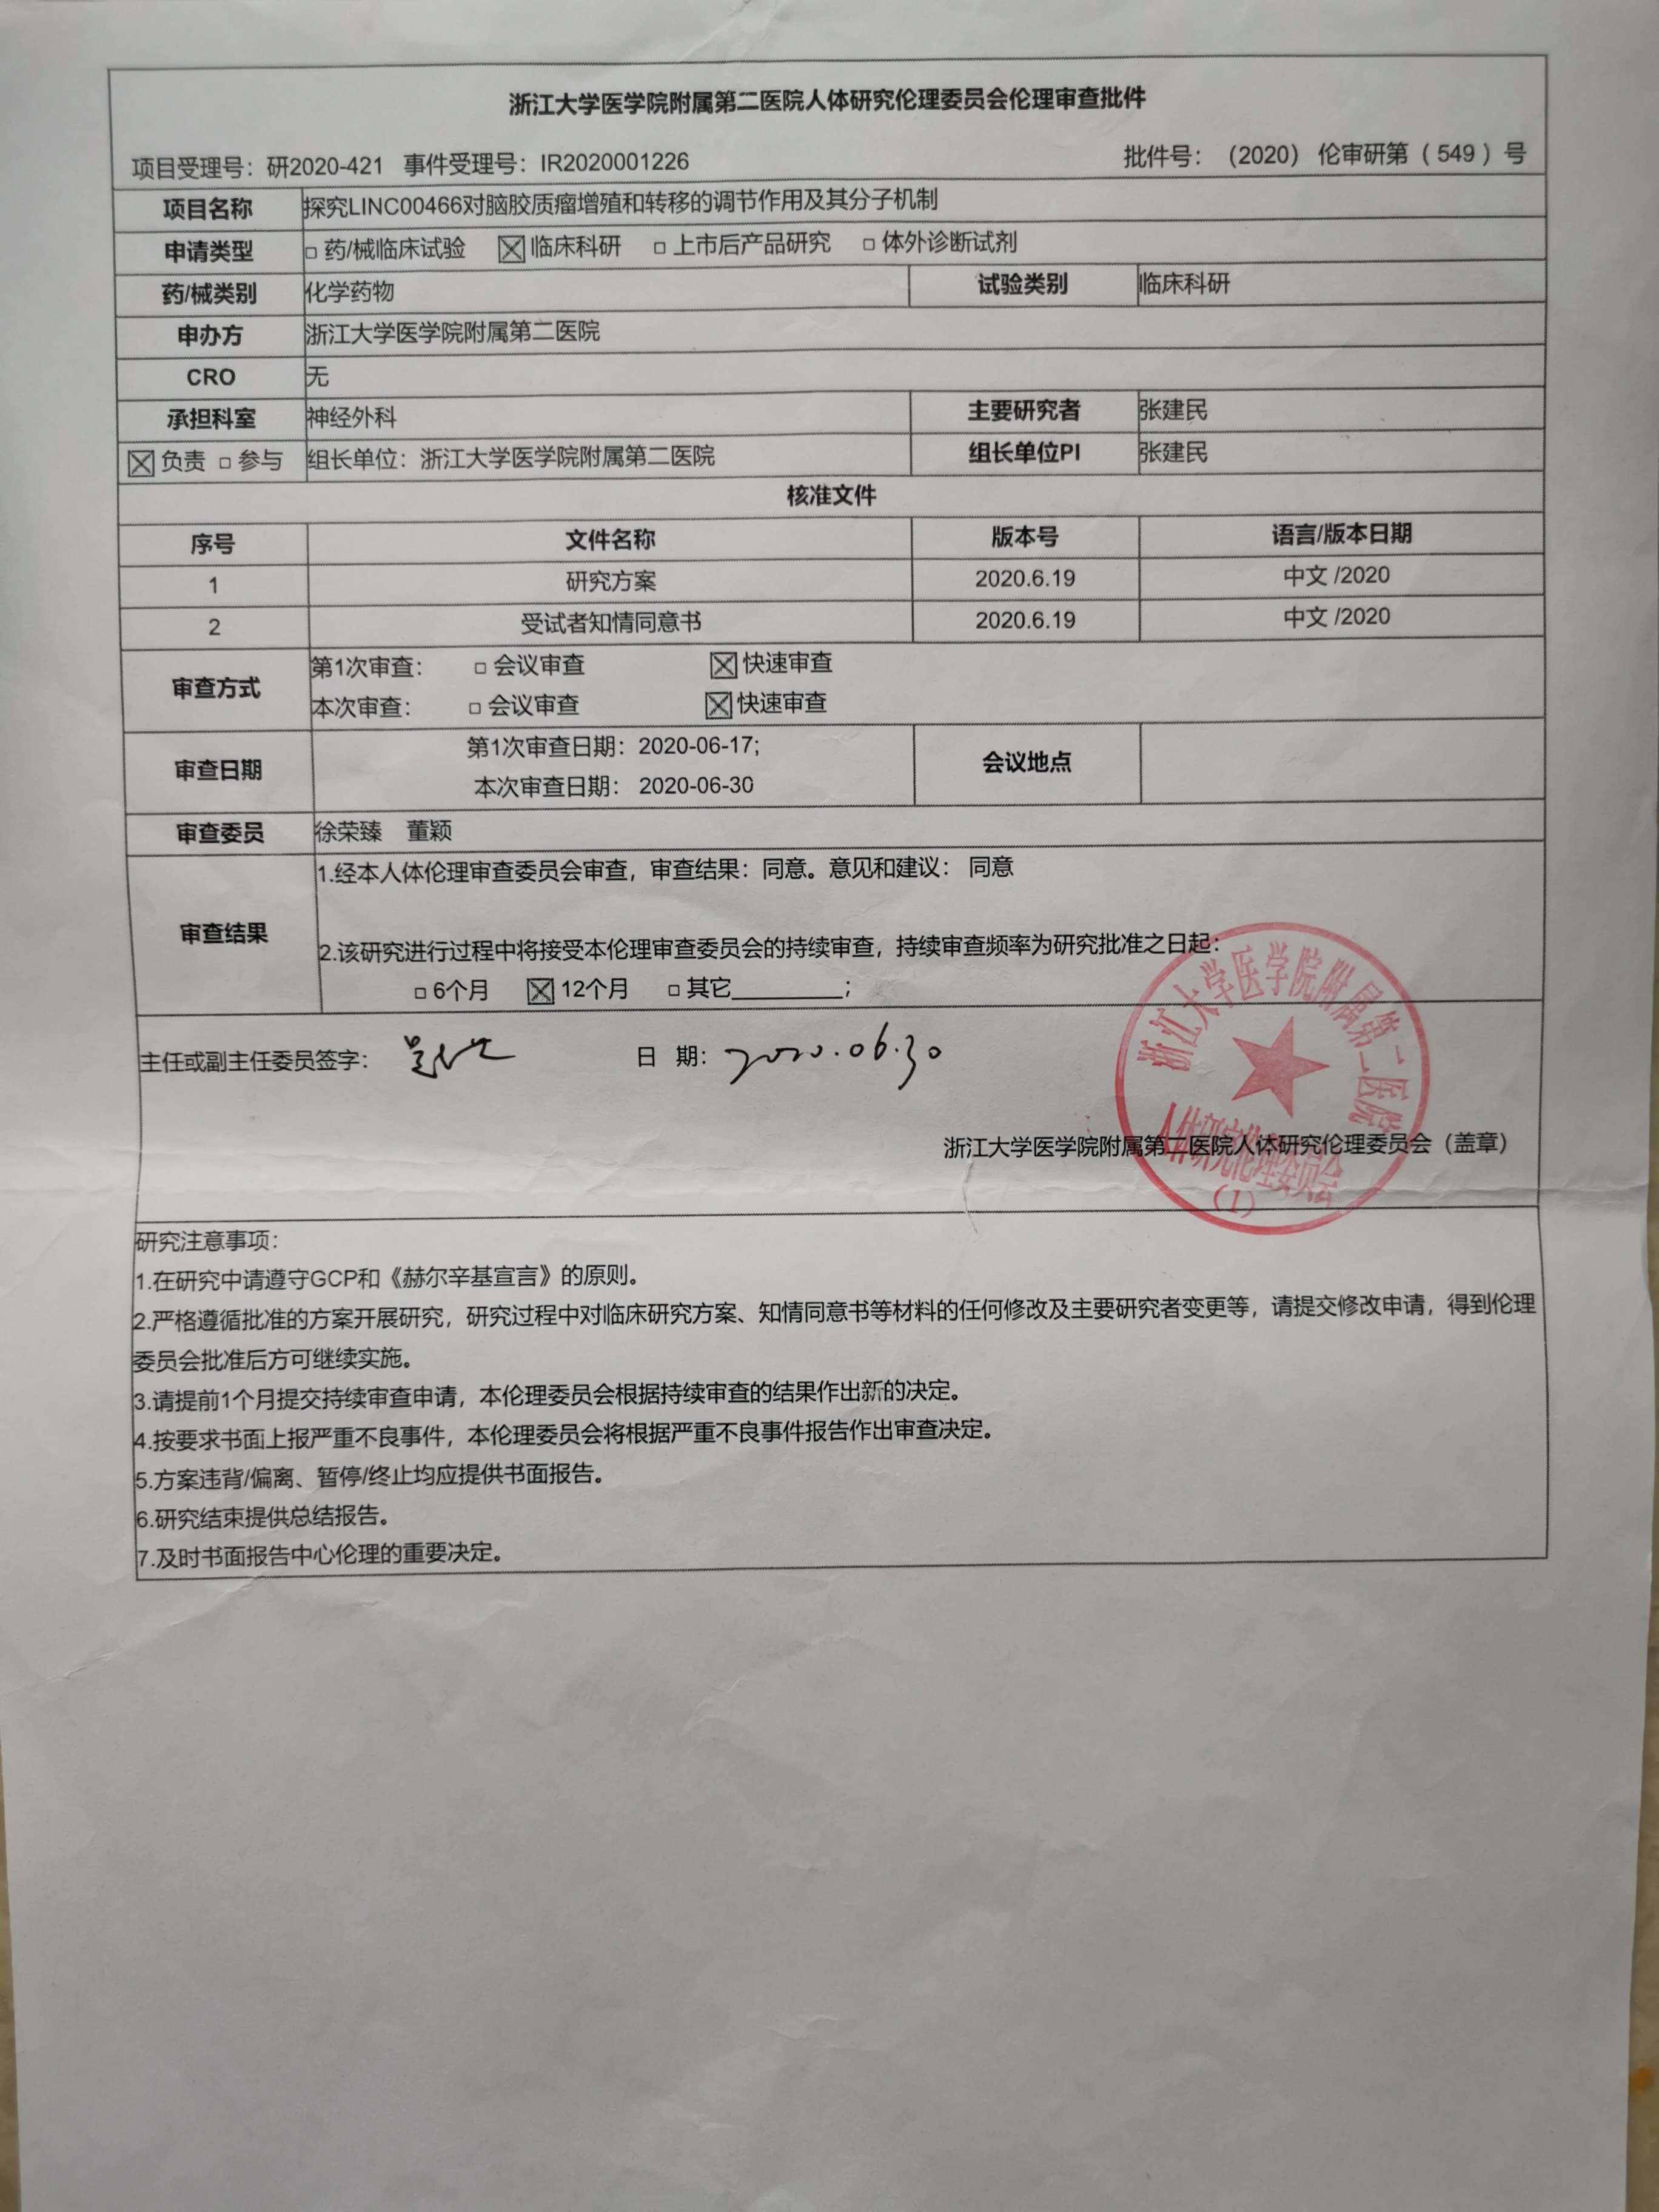


**Supplement Figure2 information of animal ethics statement (Approval No. 2020106)**


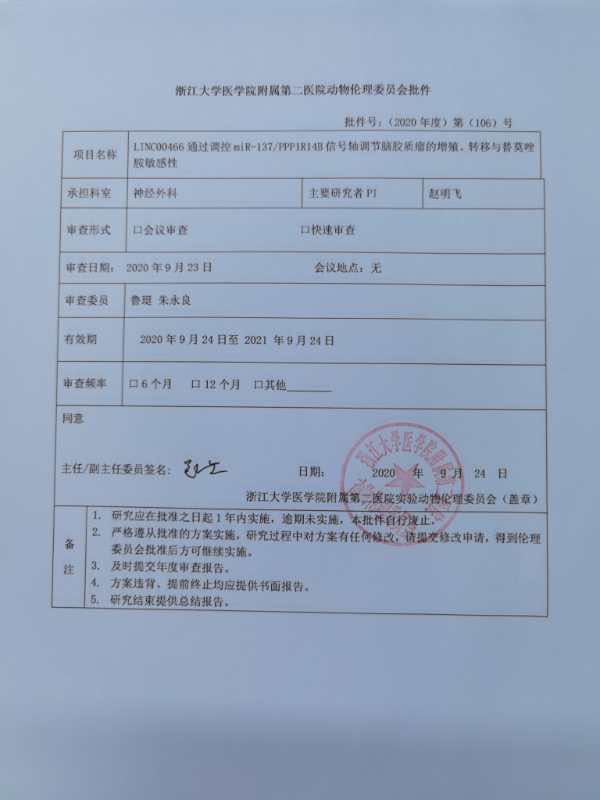

Supplement: Supplementary file 1 [file get_supplementary_file.php]
